# Supplementary material
Source: PubMed Central journal article supplement (PMC3042871)

E12.5

$Fz4^{+/+};Fz8^{-/-}$

$Fz4^{+/-};Fz8^{-/-}$

$Fz4^{-/-};Fz8^{-/-}$

EdU Calbindin DAPI

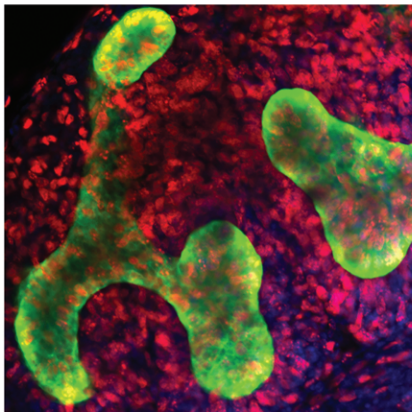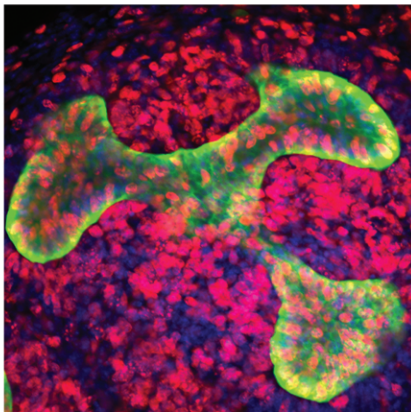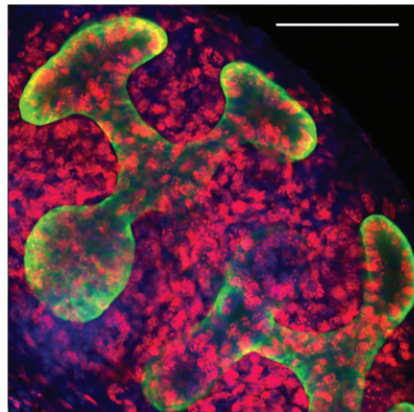

Supplement: supp_138.6.1161_DEV057620FigS2.pdf [file supp_138.6.1161_DEV057620FigS2.pdf]
